# Supplementary material
Source: publisher figshare collection journal article supplement (https://karger.figshare.com/ndownloader/files/27061952)
Supplement: Supplementary file 1 [file 27061952]

Supplementary Table 5 Sensitive analysis of vascular invasion

| Study omitted | HR (95%CI) |
| --- | --- |
| Dong et al 2019 | 4.70 [2.83, 7.81] |
| Genç et al 2018 | 4.39 [2.41, 8.01] |
| Lopez-Aguiar 2019 | 3.82 [1.85, 7.90] |
| Pulvirenti et al 2019 | 3.51 [2.44, 5.05] |
| Zou et al 2020 | 4.34 [2.46, 7.65] |
| Combined | 4.13 [2.49, 6.84] |
